# Supplementary figures and images for: Genetic variation in strigolactone production and tillering in rice and its effect on Striga hermonthica infection
Source: PubMed Central journal article supplement — Planta. 2011 Sep 25;235(3):473–84. doi: 10.1007/s00425-011-1520-y (PMC3288373; doi:10.1007/s00425-011-1520-y), 2011-09-25

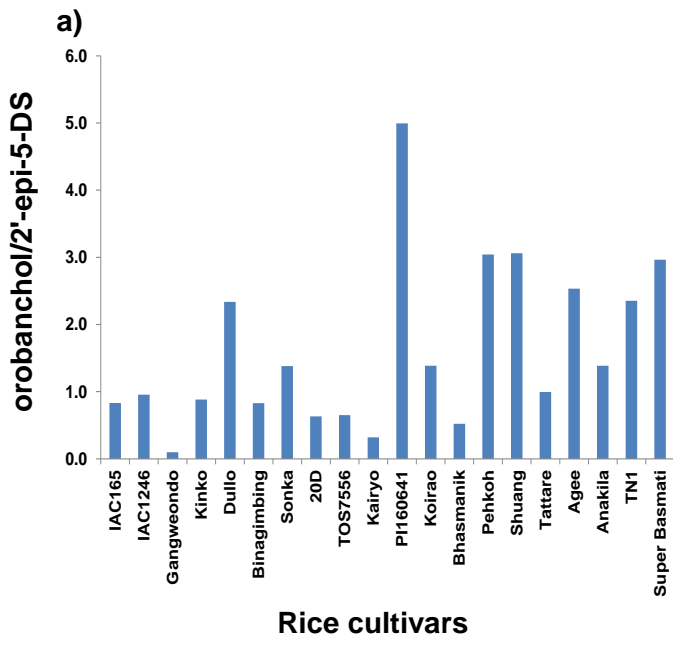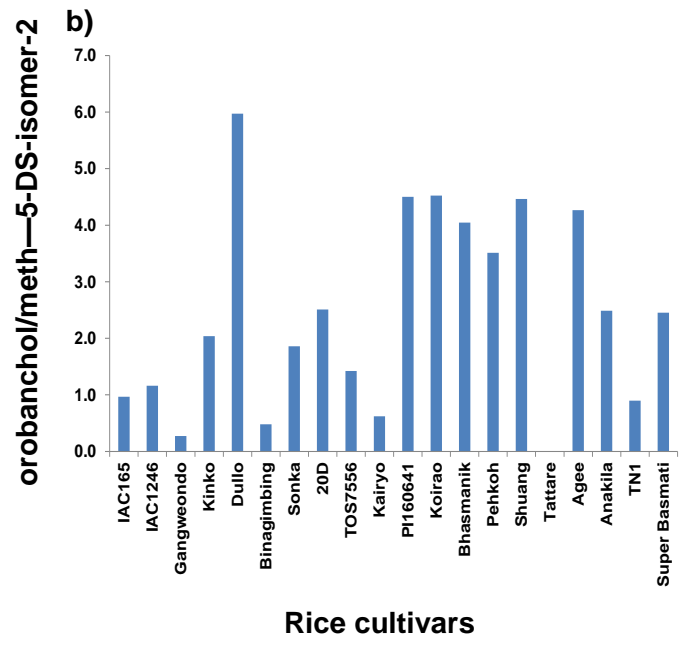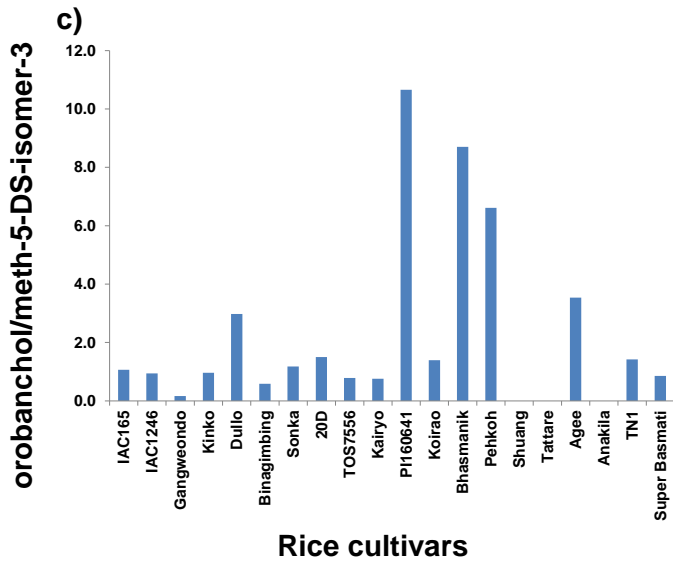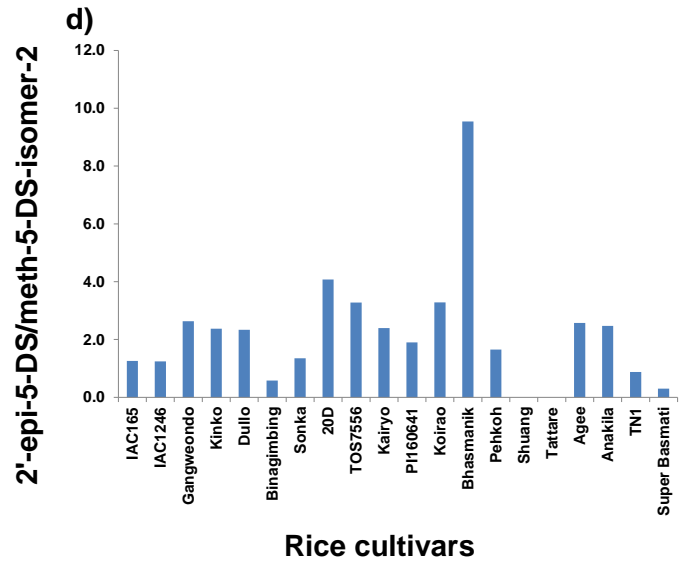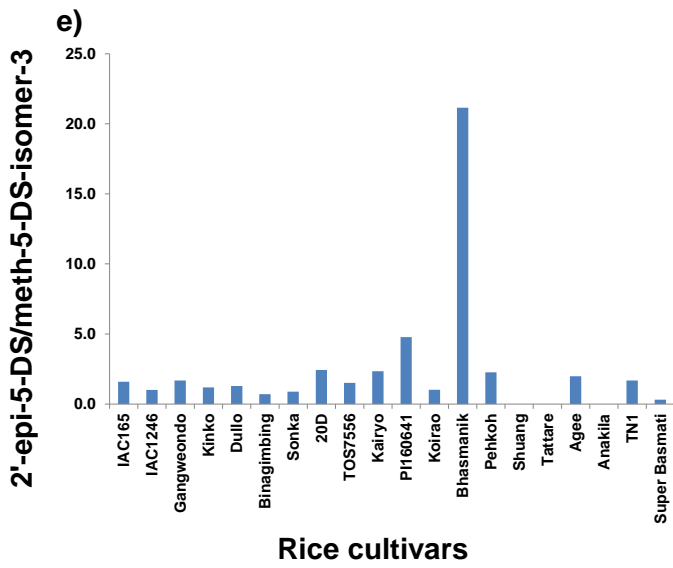

Supplement: 425_2011_1520_MOESM1_ESM.pdf [file 425_2011_1520_MOESM1_ESM.pdf]
